# Supplementary material
Source: PubMed Central journal article supplement (PMC11005088)
Supplement: NIHMS1982369-supplement-Supplementary_data_2.pdf [file NIHMS1982369-supplement-Supplementary_data_2.pdf]

10 20 30 40 50 60 70 80 90  
 CAAGAGGAGGACAAGGTGACCTATGCCAACAA C CAGCTGGGCTTTTCGGCTCCTTCACAAGATCCCGGTCTCGTCCGAGGAGAACCTCTTCT  
 CAAGAGGAGGACAAGGTGACCTATGCCAACAA T CAGCTGGGCTTTTCGGCTCCTTCACAAGATCCCGGTCTCGTCCGAGGAGAACCTCTTCT  
 100 110 120 130 140 150 160 170 180  
 TCTCGCCGTACAGTGTGTTTACAGCAATGGCAATGGCATACTTGGCGCCAGAGGCGAGACGCAGCGGGATCTGCACGAGACTCTGGGTTA  
 TCTCGCCGTACAGTGTGTTTACAGCAATGGCAATGGCATACTTGGCGCCAGAGGCGAGACGCAGCGGGATCTGCACGAGACTCTGGGTTA  
 190 200 210 220 230 240 250 260 270  
 CACGTCCGCAGGCCTGACGTCCGACCATGTACCCAGGGCCCACGCACAACACACGCATCTTCTGCG A GCACCTTTCGAACTCTACCATCCGG  
 CACGTCCGCAGGCCTGACGTCCGACCATGTACCCAGGGCCCACGCACAACACACGCATCTTCTGCG C GCACCTTTCGAACTCTACCATCCGG  
 280 290 300 310 320 330 340 350 360  
 GTCGCCAATGCAGCGGTTGTTAAAGATGGATACTCCGTGCTAAGCGAGTACCTTGAGTTGCTGAGGGGCTGCTTTGAGGCCGAAATAAATA  
 GTCGCCAATGCAGCGGTTGTTAAAGATGGATACTCCGTGCTAAGCGAGTACCTTGAGTTGCTGAGGGGCTGCTTTGAGGCCGAAATAAATA  
 370 380 390 400 410 420 430 440 450  
 CCGCTGCCTTGAGTGATCAACAGTCCTTGAACGCTATCAACGACTGGGTGAAGAACAAGACGGAGGGGAAAAATTGAGAAATTGCTCAACGA  
 CCGCTGCCTTGAGTGATCAACAGTCCTTGAACGCTATCAACGACTGGGTGAAGAACAAGACGGAGGGGAAAAATTGAGAAATTGCTCAACGA  
 460 470 480 490 500 510 520 530 540  
 ACCTCTCTCGCCAGA T GCGACCATGGTCCCTCTCAACGCTATCTACTTTAAAGGATTGTGGAGCGTGCCCTTCCAGGTGGCAGCGACGACG  
 ACCTCTCTCGCCAGA C GCGACCATGGTCCCTCTCAACGCTATCTACTTTAAAGGATTGTGGAGCGTGCCCTTCCAGGTGGCAGCGACGACG  
 550 560 570 580 590 600 610 620 630  
 AAGGCGCCGTTCTTCGATGCAGCAGCAAACAGGGTAGACGTGGACATGATGCACGCACATCTTCAGGCGGGTTACGCCCGAGACAATGAGA  
 AAGGCGCCGTTCTTCGATGCAGCAGCAAACAGGGTAGACGTGGACATGATGCACGCACATCTTCAGGCGGGTTACGCCCGAGACAATGAGA  
 640 650 660 670 680 690 700 710 720  
 CGAACACGG T TGTCTCGACCTGCCGTATGCTGGACTCGATTACAGCATGACCATTTTGTACCCCGGGA T AGAGCAGGTGCTGACACCC T  
 CGAACACGG A TGTCTCGACCTGCCGTATGCTGGACTCGATTACAGCATGACCATTTTGTACCCCGGGA G AGAGCAGGTGCTGACACCC T  
 730 740 750 760 770 780 790 800 810  
 CCGGCAAAGTCT C T CGTGGCCAGTCTTCCAGCGCCTCCTGTTCGAAACTGA T TGACACACCCGTCGACTTAGCGCTGCCCAAGTTCAAGCTG  
 CCGGCAAAGTCT T A CGTGGCCAGTCTTCCAGCGCCTCCTGTTCGAAACTGA G TGACACACCCGTCGACTTAGCGCTGCCCAAGTTCAAGCTG  
 820 830 840 850 860 870 880 890 900 910  
 GTGGGCGAATACAAACTGAAGAGACCTCTGTTCGGAGCTGGGAGCGTCGAAGGCCTTCGACGG C GGTACGCCGACTTTTCGGGAAT A ACCG  
 GTGGGCGAATACAAACTGAAGAGACCTCTGTTCGGAGCTGGGAGCGTCGAAGGCCTTCGACGG G GGTACGCCGACTTTTCGGGAAT C ACCG  
 920 930 940 950 960 970 980 990 1000  
 GCAGCCGGGACCTGGT G ATCGACGACGTCGTGCACAAGGCCGTGGTGGAGGTGAA T GAGGAAGGCAGCGAAGCAGCTGGTGCCACTGG C GT  
 GCAGCCGGGACCTGGT C ATCGACGACGTCGTGCACAAGGCCGTGGTGGAGGTGAA C GAGGAAGGCAGCGAAGCAGCTGGTGCCACTGG T GT  
 1010 1020 1030 1040 1050 1060 1070 1080 1090  
 CGTCTTCGT G GAACT AATCGCCGT GAGGG GC GTTCCA TTA GTGGTGGACCACCCCTTCTTGTTCATCCGGAACAGG C GGACCGGAGAC  
 CATCTTCGT T GAAAC AATCGCCGT CAGGG GCA TTCC GTT C GTGGTGGACCACCCCTTCTTGTTCATCCGGAACAGG A GGACCGGAGAC  
 1100 1110 1120  
 GTCC T C TTCGCGGGTCAAGTGAACCA TCT T AAS41  
 GTCC T A TTCGCGGGTCAAGTGAACCA TCT T AAS46

**97% identical**

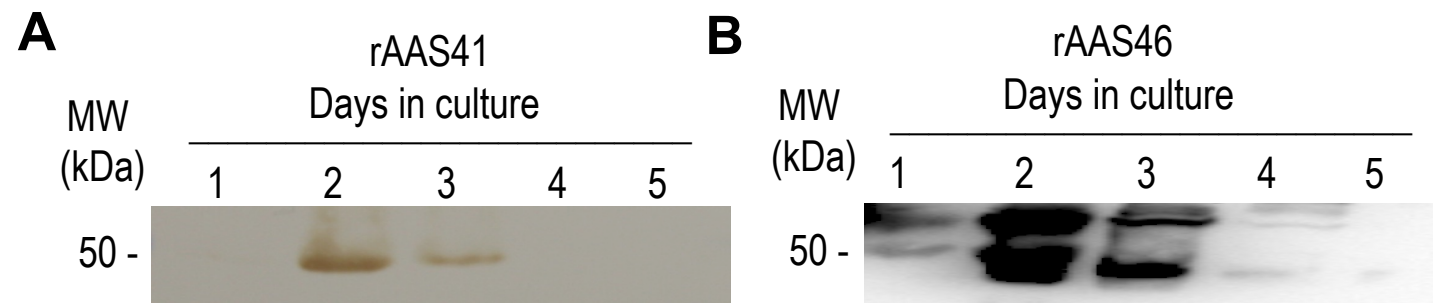

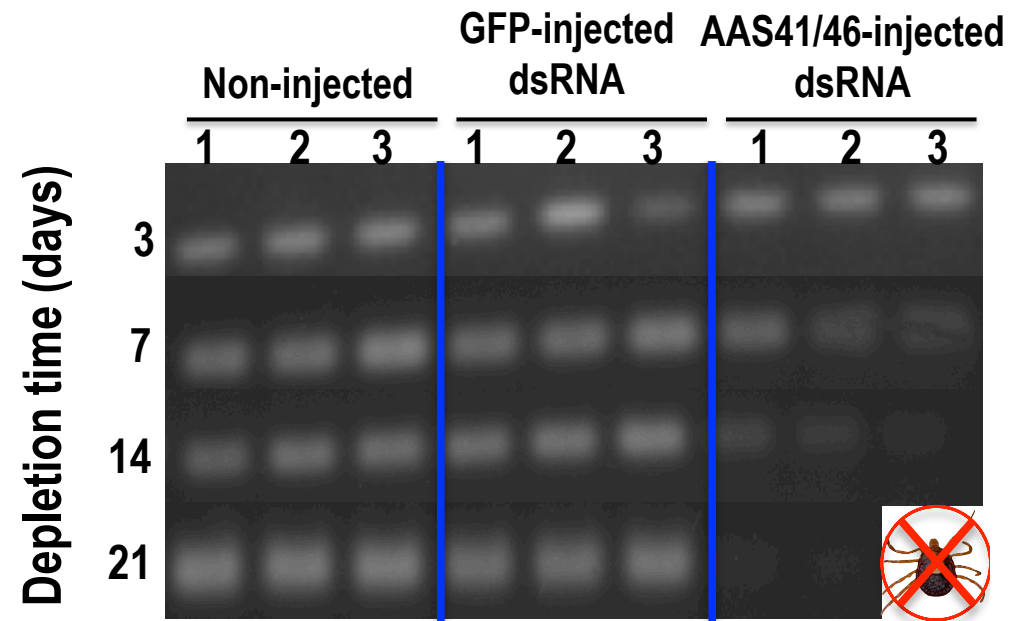

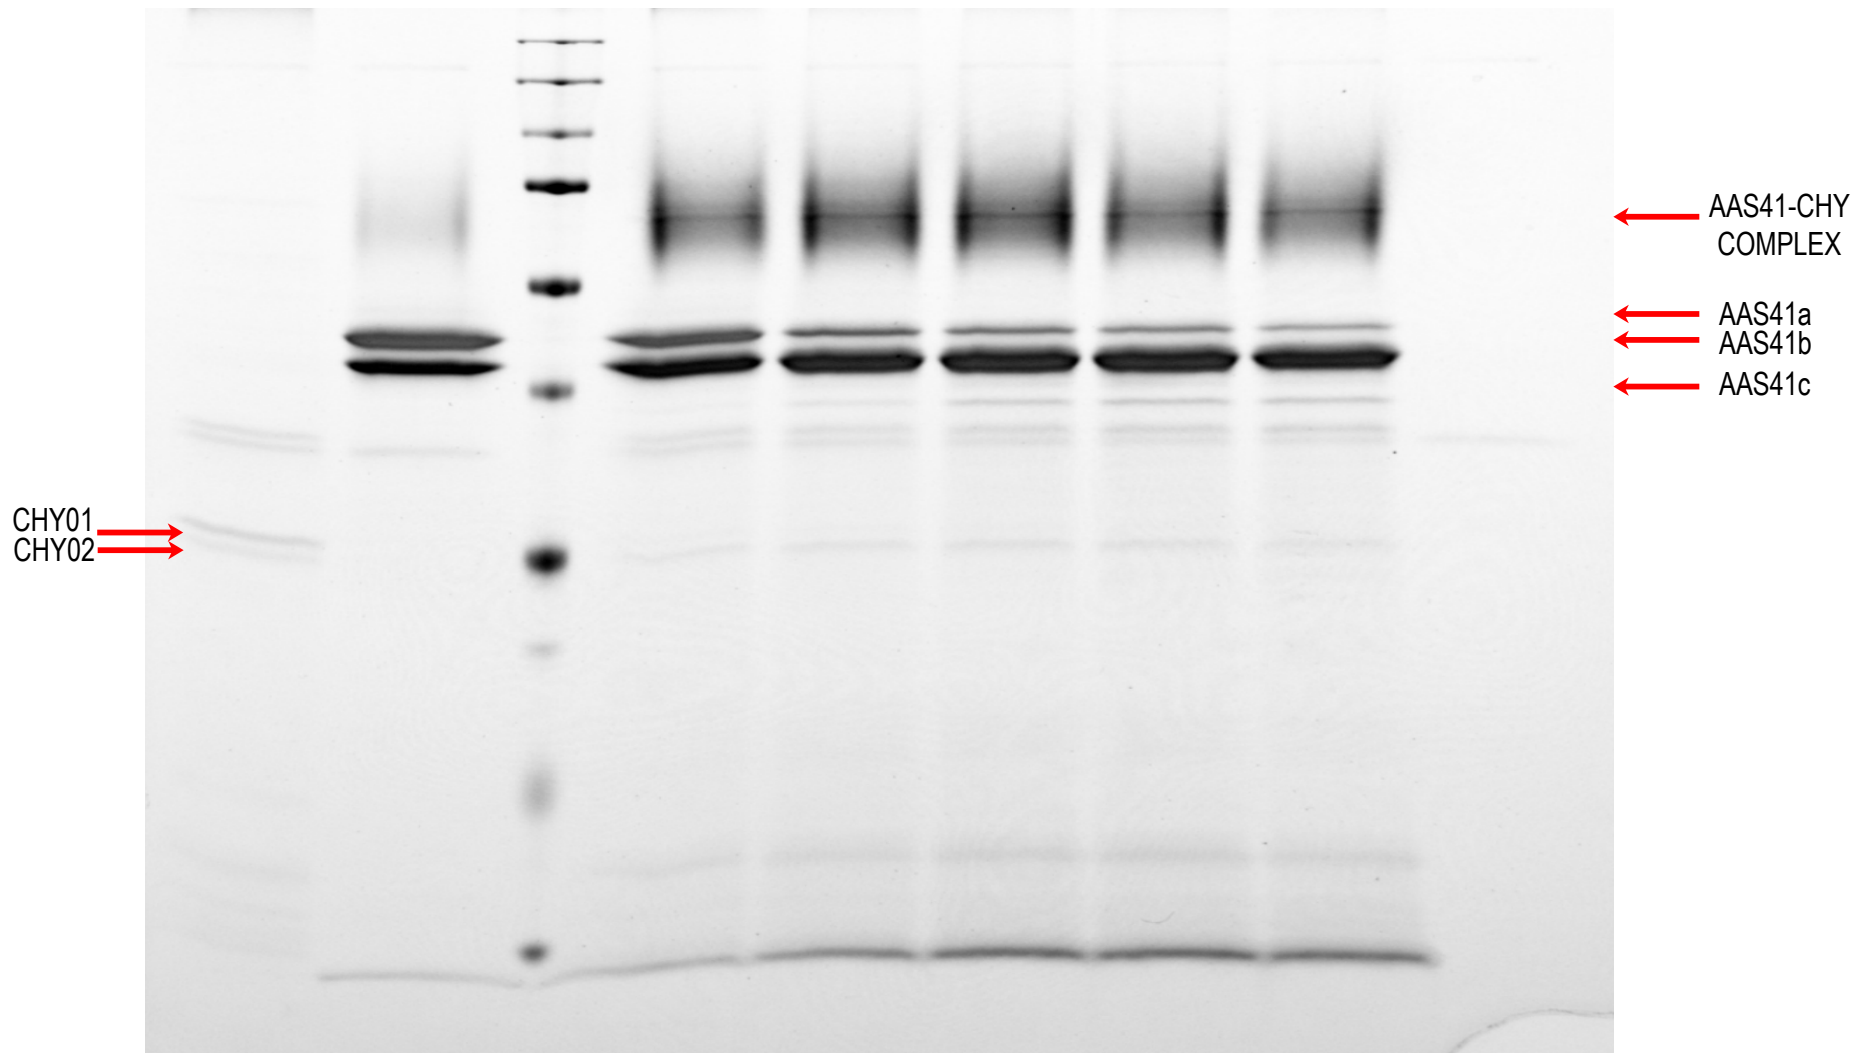

Supplementary Figure 4, Kim et al.

**Supplementary Figure 4. rAAS41-rat peritoneal extracts subjected to LC-MS/MS analysis.** Complex formation of rAAS41-rat peritoneal extract chymase complex was visualized by 12% SDS-PAGE following LC-MS/MS compatible silver staining. The in-gel bands, based on the migration of active bands from zymography (denoted by a red arrow) were excised and analyzed by LC-MS/MS. CHY01 and CHY02 represents the putative rat chymase being consistent with the molecular weight of chymase (25 – 30 kDa); AAS41-CHY COMPLEX represent the putative covalently bound complex serpin:protease based on the predicted molecular weights of rAAS41 (~45 kDa) and chymase (~25 kDa) to form an expected complex size of ~60 kDa, which is consistent with the complex formation assays; AAS41A, AAS41B, and AAS41C represents the putative forms of AAS41.
